# Supplementary material
Source: Springer Nature journal article supplement (https://www.springermedizin.de/resource/supplementary/12936_2010_1366_MOESM4_ESM.pdf/9549612)
Supplement: MOESM4 [file 9549612]

African Health Sciences (OA)  
African Journal of Biochemical Resesearch (OA)  
African Journal of Medical Sciences  
African journal of traditional, complementary,  
and alternative medicines (OA/12 Months)(PubMedCentral)  
Annals of African Medicine (OA)  
East African Journal of Public Health (OA)  
East African Medical Journal  
East African Medical Health  
Ethiopian Journal of Medicine  
Ghana Medical Journal (OA)(PubMedCentral)  
Journal of Egyptian Society of Parasitology  
Malawi Medical Journal (OA)  
Mali Medical Journal  
Nigerian Journal of Clinical Practice  
Niger Journal of Physiological Sciences  
Nigerian Journal of Medicine  
Nigerian Postgraduate Medical Journal  
Nigerian Quarterly Journal of Hospital Medicine  
Tanzanian Journal of Health Research (OA)  
South African Medical Journal (OA)
